# Supplementary material for: Tumor-associated hematopoietic stem and progenitor cells positively linked to glioblastoma progression
Source: PubMed Central journal article supplement (PMC8222381; doi:10.1038/s41467-021-23995-z), 2021-06-23
Supplement: 41467_2021_23995_MOESM3_ESM.pdf [file 41467_2021_23995_MOESM3_ESM.pdf]

## Description of Additional Supplementary Files

**Supplementary Data 1:** Top 80 gene signatures used as reference by Sylogist listed in order of decreasing specificity index  $S$

**Supplementary Data 2:** Cell type estimation results from the GSE59612 dataset [<https://www.ncbi.nlm.nih.gov/geo/query/acc.cgi?acc=GSE59612>].  $p$  values determined by 2-tailed, unpaired Student's  $t$ -test with correction by the Benjamini-Hochberg procedure

**Supplementary Data 3:** Cell type estimation results from LGG-GBM dataset.  $p$  values determined by 2-tailed, unpaired Student's  $t$ -test with correction by the Benjamini-Hochberg procedure

**Supplementary Data 4:** Information on patients recruited for the study with reference to experiments performed. KPS, Karnofsky Performance Score; *MGMT*, O6-methylguanine-DNA methyltransferase; *ATRX*, ATP-dependent helicase *ATRX*; Wt, wild type; Mut, mutant; Met, methylated; Unmet, unmethylated

**Supplementary Data 5:** Differentially expressed genes of the scRNA HSC subset.  $p$  values determined by 2-tailed, unpaired Student's  $t$ -test with Bonferroni correction (Seurat default)

**Supplementary Data 6:** Differentially expressed genes of the scRNA MPP subset.  $p$  values determined by 2-tailed, unpaired Student's  $t$ -test with Bonferroni correction (Seurat default)

**Supplementary Data 7:** Differentially expressed genes of the scRNA GMP subset.  $p$  values determined by 2-tailed, unpaired Student's  $t$ -test with Bonferroni correction (Seurat default)

**Supplementary Data 8:** Differentially expressed genes of the scRNA MEP subset.  $p$  values determined by 2-tailed, unpaired Student's  $t$ -test with Bonferroni correction (Seurat default)

**Supplementary Data 9:** Univariate Cox regression analysis of selected variables. Two-tailed likelihood ratio test corrected by the Benjamini-Hochberg procedure

**Supplementary Data 10:** Publicly available datasets analyzed in this study.
