# Supplementary material for: Tumor-associated hematopoietic stem and progenitor cells positively linked to glioblastoma progression
Source: PubMed Central journal article supplement (PMC8222381; doi:10.1038/s41467-021-23995-z), 2021-06-23
Supplement: 41467_2021_23995_MOESM5_ESM.pdf [file 41467_2021_23995_MOESM5_ESM.pdf]

## Reporting Summary

Nature Research wishes to improve the reproducibility of the work that we publish. This form provides structure for consistency and transparency in reporting. For further information on Nature Research policies, see [Authors & Referees](#) and the [Editorial Policy Checklist](#).

### Statistics

For all statistical analyses, confirm that the following items are present in the figure legend, table legend, main text, or Methods section.

n/a Confirmed

- |                                     |                                     |                                                                                                                                                                                                                                                            |
|-------------------------------------|-------------------------------------|------------------------------------------------------------------------------------------------------------------------------------------------------------------------------------------------------------------------------------------------------------|
| <input type="checkbox"/>            | <input checked="" type="checkbox"/> | The exact sample size ( $n$ ) for each experimental group/condition, given as a discrete number and unit of measurement                                                                                                                                    |
| <input type="checkbox"/>            | <input checked="" type="checkbox"/> | A statement on whether measurements were taken from distinct samples or whether the same sample was measured repeatedly                                                                                                                                    |
| <input type="checkbox"/>            | <input checked="" type="checkbox"/> | The statistical test(s) used AND whether they are one- or two-sided<br><i>Only common tests should be described solely by name; describe more complex techniques in the Methods section.</i>                                                               |
| <input type="checkbox"/>            | <input checked="" type="checkbox"/> | A description of all covariates tested                                                                                                                                                                                                                     |
| <input type="checkbox"/>            | <input checked="" type="checkbox"/> | A description of any assumptions or corrections, such as tests of normality and adjustment for multiple comparisons                                                                                                                                        |
| <input type="checkbox"/>            | <input checked="" type="checkbox"/> | A full description of the statistical parameters including central tendency (e.g. means) or other basic estimates (e.g. regression coefficient) AND variation (e.g. standard deviation) or associated estimates of uncertainty (e.g. confidence intervals) |
| <input type="checkbox"/>            | <input checked="" type="checkbox"/> | For null hypothesis testing, the test statistic (e.g. $F$ , $t$ , $r$ ) with confidence intervals, effect sizes, degrees of freedom and $P$ value noted<br><i>Give <math>P</math> values as exact values whenever suitable.</i>                            |
| <input checked="" type="checkbox"/> | <input type="checkbox"/>            | For Bayesian analysis, information on the choice of priors and Markov chain Monte Carlo settings                                                                                                                                                           |
| <input checked="" type="checkbox"/> | <input type="checkbox"/>            | For hierarchical and complex designs, identification of the appropriate level for tests and full reporting of outcomes                                                                                                                                     |
| <input type="checkbox"/>            | <input checked="" type="checkbox"/> | Estimates of effect sizes (e.g. Cohen's $d$ , Pearson's $r$ ), indicating how they were calculated                                                                                                                                                         |

*Our web collection on [statistics for biologists](#) contains articles on many of the points above.*

### Software and code

Policy information about [availability of computer code](#)

Data collection FACS Diva BD Biosciences v 8.0.1.1 ; Zeiss ZEN 2.3 Imaging Software

Data analysis Bioinformatic and statistical data analysis was performed in the R environment, version 3.6.1. Some statistical analyses were performed using Prism software (v 8.4, GraphPad). Image data were analyzed using ZEISS ZEN 2.3 Imaging Software. Multiplex ELISA was analyzed using ImageJ Software 1.46r. Illumina basecall (.bcl) data were converted and demultiplexed to FASTQ files using the bcl2fastq v2.20 software. RNA-Sequencing results were analyzed using the 10x Genomics Cell Ranger 4.0.0 pipeline and Seurat 4.0.

For manuscripts utilizing custom algorithms or software that are central to the research but not yet described in published literature, software must be made available to editors/reviewers. We strongly encourage code deposition in a community repository (e.g. GitHub). See the Nature Research [guidelines for submitting code & software](#) for further information.

### Data

Policy information about [availability of data](#)

All manuscripts must include a [data availability statement](#). This statement should provide the following information, where applicable:

- Accession codes, unique identifiers, or web links for publicly available datasets
- A list of figures that have associated raw data
- A description of any restrictions on data availability

References to repositories for publicly available RNA-Seq datasets analyzed during this study are listed in Supplementary Table 10. Single cell RNA-Seq data generated in this study (Fig. 4 and Supplementary Fig. 5) are available at the Gene Expression Omnibus under the accession number GSE165238. The source data underlying Figures 1–6 and Supplementary Figures 2 and 4–8 are provided as a Source Data file. All the other data supporting the findings of this study are available within the article and its supplementary information files and from the corresponding author upon reasonable request.

## Field-specific reporting

Please select the one below that is the best fit for your research. If you are not sure, read the appropriate sections before making your selection.

- Life sciences     Behavioural & social sciences     Ecological, evolutionary & environmental sciences

For a reference copy of the document with all sections, see [nature.com/documents/nr-reporting-summary-flat.pdf](https://www.nature.com/documents/nr-reporting-summary-flat.pdf)

## Life sciences study design

All studies must disclose on these points even when the disclosure is negative.

|                 |                                                                                                                                                                                                                                                                                                                                                                                                                                                                                                                                                                                                                                                                                                                                                                                                                                                                                                                                                                                  |
|-----------------|----------------------------------------------------------------------------------------------------------------------------------------------------------------------------------------------------------------------------------------------------------------------------------------------------------------------------------------------------------------------------------------------------------------------------------------------------------------------------------------------------------------------------------------------------------------------------------------------------------------------------------------------------------------------------------------------------------------------------------------------------------------------------------------------------------------------------------------------------------------------------------------------------------------------------------------------------------------------------------|
| Sample size     | Sample sizes were determined based on preliminary experiments in the case of in vitro and organoid experiments (Figure 5) and were considered appropriate based on the consistency of the observed effects between experiments. For patient-derived samples, we were limited by tissue availability, and sample size was considered adequate based on comparisons with data reported from other studies in the field that used similar sample sizes (e.g. Neftel et al. Cell 178,835, analyzed in supplementary Figure 4d).                                                                                                                                                                                                                                                                                                                                                                                                                                                      |
| Data exclusions | Organoid culture from one patient sample was excluded in the experiments shown in Figure 5f–5j and Supplementary Figure 7 as we did not achieve sustained growth for this particular sample. One glioblastoma patient sample was excluded from scRNA-Seq because of poor quality of cell suspension (>20% cell death as measured by trypan blue exclusion)                                                                                                                                                                                                                                                                                                                                                                                                                                                                                                                                                                                                                       |
| Replication     | <ul style="list-style-type: none"> <li>- Flow cytometry analysis of HSPC subsets was performed on 7 GBM patients and 5 non-GBM patients.</li> <li>- CFC assay was performed on 8 GBM patients and 6 non-GBM patients.</li> <li>- CXCL12 IHC staining was performed on 7 GBM patients.</li> <li>- Immunofluorescence studies were performed on 4 GBM patients and 4 autaptic tissues.</li> <li>- All in vitro experiments involving cell lines were repeated for a minimum of three times.</li> <li>- Organoid cultures were performed twice, each time with 2 different patient samples, using 3 to 8 technical replicates for each condition</li> <li>- Multiplex ELISA was performed on 2 organoids experiments using 2 different patient samples. Each cytokine was measured using 4 technical replicates for each condition.</li> <li>- Single cell RNA-Seq was performed on 1 glioblastoma sample, 1 tumor-free sample, 1 bone marrow sample and 1 blood sample.</li> </ul> |
| Randomization   | Not relevant - no treatment groups.                                                                                                                                                                                                                                                                                                                                                                                                                                                                                                                                                                                                                                                                                                                                                                                                                                                                                                                                              |
| Blinding        | Not relevant - no treatment groups.                                                                                                                                                                                                                                                                                                                                                                                                                                                                                                                                                                                                                                                                                                                                                                                                                                                                                                                                              |

## Reporting for specific materials, systems and methods

We require information from authors about some types of materials, experimental systems and methods used in many studies. Here, indicate whether each material, system or method listed is relevant to your study. If you are not sure if a list item applies to your research, read the appropriate section before selecting a response.

### Materials & experimental systems

| n/a                                 | Involved in the study                                           |
|-------------------------------------|-----------------------------------------------------------------|
| <input type="checkbox"/>            | <input checked="" type="checkbox"/> Antibodies                  |
| <input type="checkbox"/>            | <input checked="" type="checkbox"/> Eukaryotic cell lines       |
| <input checked="" type="checkbox"/> | <input type="checkbox"/> Palaeontology                          |
| <input checked="" type="checkbox"/> | <input type="checkbox"/> Animals and other organisms            |
| <input type="checkbox"/>            | <input checked="" type="checkbox"/> Human research participants |
| <input checked="" type="checkbox"/> | <input type="checkbox"/> Clinical data                          |

### Methods

| n/a                                 | Involved in the study                              |
|-------------------------------------|----------------------------------------------------|
| <input checked="" type="checkbox"/> | <input type="checkbox"/> ChIP-seq                  |
| <input type="checkbox"/>            | <input checked="" type="checkbox"/> Flow cytometry |
| <input checked="" type="checkbox"/> | <input type="checkbox"/> MRI-based neuroimaging    |

## Antibodies

### Antibodies used

Antibody;Clone;Company;Catalogue number;Dilution  
 BV421-CD10; HI10a; BD Biosciences; 562902; 1:50  
 BV510-CD90; 5E10; BD Biosciences; 563070; 1:50  
 BV711-CD135; 4G8; BD Biosciences; 563908; 1:50  
 BV785-CD45RA; HI100; BD Biosciences; 563870; 1:50  
 PE-CD34; 581; BD Biosciences; 560941; 1:25  
 Lineage Cocktail 1; 3G8L27MφP9, NCAM16.2, SJ25C1, SK7; BD Biosciences; 340546; 1:25  
 APC-CD38; HIT2; eBioscience; 17-0389-41; 1:50  
 PE-PD-L1; 29E.2A3; BioLegend; 329705; 1:100  
 FITC-CD144; 55-7H1; BD Biosciences; 560874 ;1:25  
 CXCL12; polyclonal; Abcam; ab9797; 1:600

CD34; QBEND/10; Leica; NCL-L-END; 1:250  
 CD45; polyclonal; Abcam; ab10559; 1:250  
 CD45-PE/Cyanine7; 2D1; BioLegend, 368531; 1:50  
 BV510-CD45; 2D1; BioLegend; 368525; 1:20  
 BV786-CD56; NCAM16.2; BD Biosciences; 564058; 1:20  
 anti-rabbit Alexa 488; polyclonal; Invitrogen; A11001; 1:800  
 anti-mouse Alexa 555; polyclonal; Invitrogen; A21422; 1:800

## Validation

Antigen;Clone;Company; Link; Reference  
 CD10; HI10a; BD Biosciences; <https://wwwbdbiosciences.com/ds/pm/tds/562902.pdf>; doi: 10.1084/jem.181.6.2271  
 CD90; 5E10; BD Biosciences; <https://wwwbdbiosciences.com/ds/pm/tds/563070.pdf>; doi: 10.1186/1479-5876-11-28  
 CD135; 4G8; BD Biosciences; <https://wwwbdbiosciences.com/ds/pm/tds/563908.pdf>; ISBN: 0815327455 9780815327455  
 CD45RA; HI100; BD Biosciences; <https://wwwbdbiosciences.com/ds/pm/tds/563870.pdf>; doi: 10.4049/jimmunol.0901967  
 CD34; 581; BD Biosciences; <https://wwwbdbiosciences.com/ds/pm/tds/560941.pdf>; PMID: 7680152  
 3G8L27MφP9, NCAM16.2, SJ25C1, SK7; BD Biosciences; <https://wwwbdbiosciences.com/ds/is/tds/23-3546.pdf>  
 CD38; HIT2; eBioscience; <https://www.thermofisher.com/order/genome-database/generatePdf?productName=CD38&assayType=PRANT&detailed=true&productId=17-0389-41>; doi: 10.1189/jlb.0307153  
 PD-L1; 29E.2A3; BioLegend; <https://www.biolegend.com/en-us/products/pe-anti-human-cd274-b7-h1-pd-l1-antibody-4375>; DOI: <https://doi.org/10.4049/jimmunol.170.3.1257>  
 CD144; 55-7H1; BD Biosciences; <https://wwwbdbiosciences.com/ds/pm/tds/560874.pdf>  
 CXCL12; polyclonal; Abcam; <https://www.abcam.com/sdf1-antibody-ab9797.html>  
 CD34; QBEND/10; Leica; DOI: 10.1111/j.1365-2559.1990.tb00713.x  
 CD45; polyclonal; Abcam; PMID: 29123364  
 CD45; 2D1; BioLegend, <https://www.biolegend.com/en-us/products/pe-cyanine7-anti-human-cd45-antibody-14721>; doi: 10.1093/intimm/dxh112  
 CD56; NCAM16.2; BD Biosciences; 564058; <https://wwwbdbiosciences.com/ds/pm/tds/564058.pdf>; ISBN-13 : 978-0192623768

## Eukaryotic cell lines

### Policy information about [cell lines](#)

|                                                                   |                                                                                                                                                     |
|-------------------------------------------------------------------|-----------------------------------------------------------------------------------------------------------------------------------------------------|
| Cell line source(s)                                               | The cell lines used in this study were purchased from ATCC with catalog numbers: ATCC CRL-1690 (T98-G) , ATCC HTB-14 (U-87), ATCC CRL-2611 (LN-229) |
| Authentication                                                    | No authentication was performed.                                                                                                                    |
| Mycoplasma contamination                                          | Mycoplasma contamination is routinely assessed in our lab. No mycoplasma contamination was recorded during experiments reported in manuscript.      |
| Commonly misidentified lines (See <a href="#">ICLAC</a> register) | No commonly misidentified line was used according to ICLAC register version 10.                                                                     |

## Human research participants

### Policy information about [studies involving human research participants](#)

|                            |                                                                                                                                                                                                                                                                                                                                                                                                                                                                                                                                                                                                   |
|----------------------------|---------------------------------------------------------------------------------------------------------------------------------------------------------------------------------------------------------------------------------------------------------------------------------------------------------------------------------------------------------------------------------------------------------------------------------------------------------------------------------------------------------------------------------------------------------------------------------------------------|
| Population characteristics | Population characteristics are outlined in Supplementary Table 4.                                                                                                                                                                                                                                                                                                                                                                                                                                                                                                                                 |
| Recruitment                | Tissue samples (n = 27) were obtained from donors admitted for surgery at the Department of Neurosurgery at the University Hospital Essen after acquiring informed consent. To avoid potential biases, comparisons of samples from human research participants (Figure 3 and supplementary Figure 4c) were conducted by recruiting unselected, consecutive patients derived from a single source and processed identically. Two additional patient samples were obtained from the University of Bonn and were used to generate cell cultures for the organoid experiments shown in Figures 5f-5j. |
| Ethics oversight           | Biosamples were obtained from 29 patients after informed consent at the Departments of Neurosurgery of the University Hospitals Bonn and Essen. At each site, the local ethics committees approved the study (University Bonn #182/08; University of Duisburg-Essen, #19_8706_BO). Human biological samples and related data collected in Essen were provided by the Westdeutsche Biobank Essen (WBE, University Hospital Essen, University of Duisburg-Essen, Germany, approval 19_WBE_074).                                                                                                     |

Note that full information on the approval of the study protocol must also be provided in the manuscript.

## Flow Cytometry

### Plots

Confirm that:

- The axis labels state the marker and fluorochrome used (e.g. CD4-FITC).
- The axis scales are clearly visible. Include numbers along axes only for bottom left plot of group (a 'group' is an analysis of identical markers).
- All plots are contour plots with outliers or pseudocolor plots.
- A numerical value for number of cells or percentage (with statistics) is provided.

### Methodology

Sample preparation

Fresh surgical tissue was placed in ice-cold DMEM/F12-based transport medium in the operating room and received on ice at the lab within 30 minutes thereafter. The tumor tissues were subsequently cut into small pieces and homogenized in Iscove's Modified Dulbecco's Medium (IMDM) with 0.11 DMC U/mL neutral protease (Nordmark Biochemicals) at 37°C for 1-2 hour in a shaker-incubator (shaking speed: 250 rpm). The homogenized tissues were centrifuged for 10 minutes at 300 xg, resuspended in IMDM and filtered through a 40 µm cell strainer for the following FACS analysis.

Instrument

All flow cytometry analyses were performed using BD FACSCelesta™ Flow Cytometer with BVYG Configuration (no. 660345).

Software

FACS Diva BD Biosciences v 8.0.1.1; FlowJo (Version 10.6.2)

Cell population abundance

No cell-sorting performed.

Gating strategy

Gating strategies are provided in Fig. 3c, Fig. 5a and Supplementary Fig. 4a-c and Supplementary Fig.7

- Tick this box to confirm that a figure exemplifying the gating strategy is provided in the Supplementary Information.
